# Supplementary material for: Customized digestion protocols for copepods, euphausiids, chaetognaths and fish larvae facilitate the isolation of ingested microplastics
Source: Sci Rep. 2024 Aug 28;14:19985. doi: 10.1038/s41598-024-70366-x (PMC11358325; doi:10.1038/s41598-024-70366-x)
Supplement: Supplementary file 1 — Supplementary Table S1. [file 41598_2024_70366_MOESM1_ESM.xlsx]

## Sheet: TabS1_ReviewTable
Table S1: Overview of existing digestion protocols for the isolation of ingested microplastics from marine animals
ID	Reagent name	Protocol	Step	Temp- erature	Duration	Taxon	Scientific name	Tissue	Digestion efficacy	Limitations	MP Types tested	MP Alteration	Additional information	Source
Aves
1	KOH (1M)	A	1	18-21°C	15 d	Aves	Ardenna carneipes	gizzard	not tested	digestion incomplete	NA	not tested*		Lavers et al. 2019
2	KOH (1M)	B	1	60°C	12 h	Aves	Ardenna carneipes	gizzard	not tested		NA	not tested*		Lavers et al. 2019
3	Corolase (1%, 3%)	C	1	60°C	20 h	Aves	Ardenna carneipes	gizzard	not tested	digestion incomplete	NA	not tested		Lavers et al. 2019
4	Corolase (10%)	E	1	60°C	9 h	Aves	Ardenna carneipes	gizzard	not tested		NA	not tested		Lavers et al. 2019
Cetacea
5	KOH (10%)	A	1	unkown	unkown	Cetacea	Megaptera novaeangliae	gastrointestinal tract	not tested		NA	not tested*	washing machine used	Besseling et al. 2015
6	KOH (10%)	A	1	20°C	3 wk	Cetacea	Mesoplodon mirus	gastrointestinal tract	not tested		NA	not tested*		Lusher et al. 2015
7	Detergent (enzyme based)	A	1	60°C	unkown	Cetacea	Phocoena phocoena	gastrointestinal tract	not tested		NA	not tested*	washing machine used	Philipp et al. 2020
Cnidaria
8	CH2O2 (3%)	A	1	unkown	72 h	Scleractinia	Dipsastraea pallida	whole organism	not tested	digestion incomplete	NA	not tested*	only decalcification	Hall et al. 2015
9	HNO3 (65%)	A	1	unkown	unkown	Actinaria	Actinia equina	whole organism	not tested		LDPE, PP, EPS, PA, PET, PE	severe (PP, PE, PA, EPS, PET, LDPE)*	microwave used	Karlsson et al. 2017
	H2O2 (>30%)		2	unkown	unkown
	NaOH (2M)		3	unkown	unkown
Crustacea
10	HCl (1M/2M)	B	1	20˚C	24 h	Zooplankton, Copepoda	unspecified zooplankton, Temora longicornis	whole organism	0.82	digestion incomplete	NA	not tested*		Cole et al. 2014
11	HCl (100%)	C	1	20˚C	1 - 3 h	Euphausiacea	Thysanoessa spinifera	whole organism	not tested	digestion incomplete	NA	not tested*		Desforges et al. 2015
12	HCl (100%)	D	1	80˚C	1 - 3 h	Euphausiacea	Thysanoessa spinifera	whole organism	not tested	digestion incomplete	NA	not tested*		Desforges et al. 2015
13	HNO3 (69%)	A	1	40°C, 50°C, 60°C	24 - 48 h	Decapoda	Nephrops norvegicus	gastrointestinal tract	1.1		PP, PS, PET, PA, HDPE, LDPE	severe (PA, PS), intermediate (PP, PET, HDPE, LDPE)*		Hara et al. 2020
14	HNO3 (70%)	D	1	22–24°C	18 h/ 24 h	Decapoda	Penaeus merguiensis	gastrointestinal tract	98 - 99%	24 h better than 18 h	PA, PE, PES, PP, PS, PVC, rayon	24 h: severe (PA, PES, Rayon, PE)*		Li et al. 2022
15	HNO3 (100%)	G	1	80˚C	30 min	Euphausiacea, Copepoda	Thysanoessa spinifera, Neocalanus cristatus, Euphausia pacifia	whole organism	not tested	oily residue	NA	not tested*	most effective protocol	Desforges et al. 2015
16	HNO3 (100%) & HCl (100%)	H	1	20˚C	1 - 3 h	Euphausiacea	Thysanoessa spinifera	whole organism	not tested	digestion incomplete	NA	not tested*		Desforges et al. 2015
17	HNO3 (100%) & HCl (100%)	I	1	80˚C	1 - 3 h	Euphausiacea	Thysanoessa spinifera	whole organism	not tested	digestion incomplete	NA	not tested*		Desforges et al. 2015
18	HNO3 (65%) & HClO4 (68%)	A	1	20˚C	12 h	Decapoda	Crangon crangon	whole organism, peeled	not tested		NA	not tested*		Devriese et al. 2015
	HNO3 (65%) & HClO4 (68%)		2	>80˚C	10 min
19	KOH (10%)	A	1	40˚C	48 h	Amphipoda	Hirondellea sp., Eurythenes gryllus	hindgut	not tested		NA	not tested*		Jamieson et al. 2019
20	KOH (10%)	A	1	60˚C	24 h	Decapoda	Necora puber	whole animals, soft tissue	not tested		LDPE, HDPE, PP, PA, PS	severe (CA), intermediate (PET)*	most effective protocol	Dehaut et al. 2016
21	KOH (10%)	B	1	40°C, 50°C, 60°C	24 - 48 h	Decapoda	Nephrops norvegicus	gastrointestinal tract	0.96	digestion incomplete	PP, PS, PET, PA, HDPE, LDPE	none*		Hara et al. 2020
22	KOH (10%) & Tween 20	C	1	40°C, 50°C, 60°C	24 - 48 h	Decapoda	Nephrops norvegicus	gastrointestinal tract	95-105%	digestion incomplete, foaming >40°C	PP, PS, PET, PA, HDPE, LDPE	none*		Hara et al. 2020
23	KOH (10%)	E	1	40°C	3 d/ 5 d	Decapoda	Penaeus merguiensis	gastrointestinal tract	91 - 93%	digestion incomplete	NA	not tested*		Li et al. 2022
24	NaOH (1M/2M)	E	1	20˚C	24 h	Zooplankton, Copepoda	unspecified zooplankton, Temora longicornis	whole organism	90%, 85%		NA	not tested*		Cole et al. 2014
25	NaOH (1M, 10M)	C	1	60˚C	24 h	Zooplankton, Copepoda	unspecified zooplankton, Temora longicornis	whole organism	not reported, 91%		PS, Nylon, PE, uPVC, PES	severe (Nylon, PE, PES), intermediate (uPVC)*		Cole et al. 2014
26	NaOH (5M, 10M)	D	1	20˚C	48 h	Zooplankton, Copepoda	unspecified zooplankton, Temora longicornis	whole organism	not reported		NA	not tested*		Cole et al. 2014
27	H2O2 (10%)	B	1	100°C	5 min/ 10 min	Decapoda	Penaeus merguiensis	gastrointestinal tract	95 - 97%	<10 min digestion incomplete	PA, PE, PES, PP, PS, PVC, rayon	10 min: severe (Rayon)*	microwave	Li et al. 2022
28	H2O2 (30%)	C	1	40°C	2 d/ 4 d	Decapoda	Penaeus merguiensis	gastrointestinal tract	94 - 96%	<4 d digestion incomplete	PA, PE, PES, PP, PS, PVC, rayon	4 d: severe (Rayon)*		Li et al. 2022
29	H2O2 (100%)	A	1	20˚C	1 - 3 h	Euphausiacea	Thysanoessa spinifera	whole organism	not tested	digestion incomplete	NA	not tested*		Desforges et al. 2015
30	H2O2 (100%)	B	1	80˚C	1 - 3 h	Euphausiacea	Thysanoessa spinifera	whole organism	not tested	digestion incomplete	NA	not tested*		Desforges et al. 2015
31	HCl (100%) & H2O2 (100%)	E	1	20˚C	1 - 3 h	Euphausiacea	Thysanoessa spinifera	whole organism	not tested	digestion incomplete	NA	not tested*		Desforges et al. 2015
32	HCl (100%) & H2O2 (100%)	F	1	80˚C	1 - 3 h	Euphausiacea	Thysanoessa spinifera	whole organism	not tested	digestion incomplete	NA	not tested*		Desforges et al. 2015
33	HNO3 (unknown)	A	1	unspecified	45 min	Amphipoda	Gammarus spp.	whole organism	not tested		NA	not tested*	microwave used	Leslie et al. 2017
	H2O2 (30%)		2	unknown	unknown
	NaOH (unknown)		3	unknown	unknown
34	HNO3 (65%)	A	1	unkown	unkown	Decapoda	Hemigrapsus sanguineus	whole organism, soft tissue	not tested		LDPE, PP, EPS, PA, PET, PE	severe (PP, PE, PA, EPS, PET, LDPE)*	microwave used	Karlsson et al. 2017
	H2O2 (>30%)		2	unkown	unkown
	NaOH (2M)		3	unkown	unkown
35	HNO3 (unknown)	A	1	unspecified	45 min	Decapoda	Carcinus maenas	whole organism, soft tissue	not tested		NA	not tested*	microwave used	Leslie et al. 2017
	H2O2 (30%)		2	unknown	unknown
	NaOH (unknown)		3	unknown	unknown
36	HNO3 (65%)	A	1	unkown	unkown	Isopoda	Isopoda sp	whole organism, soft tissue	not tested		LDPE, PP, EPS, PA, PET, PE	severe (PP, PE, PA, EPS, PET, LDPE)*	microwave	Karlsson et al. 2017
	H2O2 (>30%)		2	unkown	unkown
	NaOH (2M)		3	unkown	unkown
37	Protease K	A	1	40°C	48 h	Decapoda	Penaeus merguiensis	gastrointestinal tract	94 - 95%	digestion incomplete	NA	not tested	homogenized vs. not homogenized	Li et al. 2022
	Chitinase		2	37°C	72 h
38	Proteinase K	F	1	50˚C	2 h	Zooplankton, Copepoda	unspecified zooplankton, Temora longicornis	whole organism	0.97	high cost	PS, Nylon, PE, uPVC, PES	none	most effective protocol	Cole et al. 2014
	NaClO4 (5M)		2	20°C	>20 min
	NaClO4 (5M)		3	60°C	20 min
Echinodermata
39	HNO3 (65%)	A	1	unkown	unkown	Ophiurida	Ophiura sp.	whole organism, soft tissue	not tested		LDPE, PP, EPS, PA, PET, PE	severe (PP, PE, PA, EPS, PET, LDPE)*	microwave used	Karlsson et al. 2017
	H2O2 (>30%)		2	unkown	unkown
	NaOH (2M)		3	unkown	unkown
Fish
40	HCl (5%)	B	1	25°C, 40°C, 50°C, 60°C	4 d	Pisces	Clarias gariepinus	muscle & skin	53 - 89%	digestion incomplete	HDPE, LDPE, PP, PVC, PET, PS, NY6 or NY66	not tested*		Karami et al. 2017
41	HCl (37%)	C	1	25°C, 40°C, 50°C, 60°C	4 d	Pisces	Clarias gariepinus	muscle & skin	99 - 100%		HDPE, LDPE, PP, PVC, PET, PS, NY6 or NY66	severe (NY6, NY66, PET, PVC)*		Karami et al. 2017
42	HNO3 (5%)	D	1	25°C, 40°C, 50°C, 60°C	4 d	Pisces	Clarias gariepinus	muscle & skin	53 - 92%	digestion incomplete	HDPE, LDPE, PP, PVC, PET, PS, NY6 or NY67	not tested*		Karami et al. 2017
43	HNO3 (unknown)	A	1	70˚C	2 h	Pisces	Danio rerio	liver, gills, gut	not tested		NA	not tested*		Lu et al. 2016
44	HNO3 (69%)	E	1	25°C, 40°C, 50°C, 60°C	4 d	Pisces	Clarias gariepinus	muscle & skin	91 - 100%		HDPE, LDPE, PP, PVC, PET, PS, NY6 or NY67	severe (NY6, NY66, PS, LDPE, PP, HDPE, PVC)*		Karami et al. 2017
45	HNO3 (22.5 M)	C	1	20˚C	12 h	Pisces	Mugil cephalus	gastrointestinal tract	not tested		PE, PS	severe (PE, PS)*		Avio et al. 2015
	HNO3 (22.5 M)		2	100˚C	30 min
46	KOH (1M)	A	1	18-21°C	2 d	Pisces	Sprattus sprattus	gastrointestinal tract & whole organism	not tested		LDPE, PP, PBT, EVA, VA, PET, PE-LLD, SAN, PA66, GPPS, PC, CA PA6, ABS, HDPE, Cradonyl, PLA, other unspecified collected material	severe (CA, LDPE, PLA, Cradonyl)*	pristine, industrially fabricated and material collected from beaches	Kühn et al. 2017
47	KOH (10%)	A	1	60˚C	24 h	Pisces	Spondyliosoma cantharus	alimentary tract	not tested	digestion incomplete	LDPE, HDPE, PP, PA, PS	severe (CA), intermediate (PET)*		Dehaut et al. 2016
48	KOH (10%)	A	1	60˚C	24 h	Pisces	Spondyliosoma cantharus	fillet	not tested		LDPE, HDPE, PP, PA, PS	severe (CA), intermediate (PET)*	most effective protocol	Dehaut et al. 2016
49	KOH (10%)	A	1	20°C	2 - 3 wk	Pisces	Gadus morhua, Merlangius merlangus, Melanogrammus aeglefinus, Clupea harengus, Trachurus trachurus, Eutrigla gurnardus, Scomber scombrus	gastrointestinal tract	not tested		unspecified	not tested*		Foekema et al. 2013
50	KOH (10%)	A	1	unkown	2 wk	Pisces	Benthosema glaciale, Myctophum punctatum, Notoscopelus kroyeri, Lampanyctus crocodilus, Maurolicus muelleri, Stomias boa boa, Nemichthys scolopaceus, Arctozenus risso, Xenodermichthys copei, Argyropelecus spp.	gastrointestinal tract	not tested		NA	not tested*		Lusher et al. 2016
51	KOH (10%)	A	1	60˚C	12 h	Pisces	Atherinopsis californiensis, Engraulis mordax, Scomber japonicus, Sebastes flavidus, Morone saxatilis, Oncorhynchus tshawytscha, Thunnus alalunga, Sebastes mystinus, Citharichthys sordidus, Ophiodon elongatus, Sebastes caurinus, Sebastes miniatus, Oreochromis niloticus, Katsuwonus pelamis, Rastrelliger kanagurta, Decapterus macrosoma, Spratelloides gracilis, Carangidae, Siganus argenteus, Siganus…	gastrointestinal tract	not tested		NA	not tested*		Rochman et al. 2015
52	KOH (10%)	A	1	40°C	10 d	Fish	Engraulis japonicus	gastrointestinal tract	not tested		NA	not tested*	3-4 days sufficient	Tanaka & Takada 2016
53	KOH (10%)	A	1	50°C	12 h	Fish	Mullus barbatus	gastrointestinal tract	not tested		PE, PP, PET	not reported*		Tsangaris et al. 2021
	KOH (10%)		2	20°C	<48 h
54	KOH (10%)	A	1	unknown	unknown	Pisces	Zoarces viviparus	gastrointestinal tract	not tested		NA	not tested*		Wesch et al. 2016
55	KOH (10%)	F	1	25°C, 40°C, 50°C, 60°C	4 d	Pisces	Clarias gariepinus	muscle & skin	97 - 99%		HDPE, LDPE, PP, PVC, PET, PS, NY6 or NY68	>50°C: intermediate (NY66); severe (PET, PVC)*	most effective protocol 40°C (2-3 d)	Karami et al. 2017
56	KOH (10%)	A	1	unknown	unknown	Pisces	Oryzias latipes	gastrointestinal tract	not tested		NA	not tested*		Wagner et al. 2017
57	KOH (100%)	B	1	20°C	5 h	Pisces	Gadus morhua	gastrointestinal tract	not tested	slimey residue	PP, LDPE, HDPE, PS, EPS, ABS, PUR, PA,EVA, PET, PC, Nitrile, PVC, PMMA, PTFE, RE	none*		Enders et al. 2017
	KOH (100%)		2	80°C	20 min
58	NaOH (5M)	H	1	25°C, 40°C, 50°C, 60°C	4 d	Pisces	Clarias gariepinus	muscle & skin	29 - 91%	digestion incomplete	NA	not tested*		Karami et al. 2017
59	NaClO (5%)	G	1	25°C, 40°C, 50°C, 60°C	4 d	Pisces	Clarias gariepinus	muscle & skin	68 - 82%	digestion incomplete	NA	not tested*		Karami et al. 2017
60	H2O2 (15%)	B	1	50°C	30 h	Pisces	Mullus barbatus	gastrointestinal tract	not tested		PE, PP, PET	not reported*		Tsangaris et al., 2021
	H2O2 (15%)		2	20°C	<5 d
61	H2O2 (15%)	A	1	50˚C	12 h	Pisces	Sardina pilchardus, Squalus acanthias, Merlucius merlucius, Mullus barbatus, Chelidonichthys lucernus, Mugil cephalus	gastrointestinal tract & liver	not tested		NA	not reported*	density separation follwed by chemical digestion	Avio et al. 2015
62	H2O2 (30%)	A	1	65°C	24 - 72 h	Pisces	Hyporhamphus intermedius, Liza haematocheila, Coilia ectenes, Lateolabrax japonicus, Sillago sihama, Larimichthys crocea, Psenopsis anomala, Pampus cinereus, Harpodon nehereus, Mugil cephalus, Muraenesox cinereus, Terapon jarbua, Sebastiscus marmoratus, Photopectoralis bindus, Cynoglossus abbreviatus, Thamnaconus septentrionalis, Oxyeleotrix marmorata, Synechogobius ommaturus, Collichthys lucidus…	gastrointestinal tract	not tested		NA	not tested*		Jabeen et al. 2017
63	H2O2 (30%)	B	1	55˚C	7 d	Fish	Mugil cephalus	gastrointestinal tract	not tested	foaming	NA	not reported*		Avio et al. 2015
64	H2O2 (30%)	A	1	50˚C	48 h	Fish	Sardinia pilchardus, Engraulis encrasicolus	gastrointestinal tract	not tested		NA	not tested*		Renzi et al. 2019
65	H2O2 (35%)	A	1	25°C, 40°C, 50°C, 60°C	4 d	Pisces	Clarias gariepinus	muscle & skin	87 - 100%	<50°C digestion incomplete; 50°C foaming	HDPE, LDPE, PP, PVC, PET, PS, NY6 or NY69	<60°C: not tested; 60°C: severe (NY6, NY66, PVC), intermediate (PET)*		Karami et al. 2017
66	H2O2 (unknown)	A	1	unknown	unknown	Pisces	Mullus barbatus, Citharus linguatula, Pagellus erithrinus, Sardina pilchardus	gastrointestinal tract	not tested		NA	not tested*		Torre et al. 2016
67	NaOH (1M) & SDS (0.5%)	A	1	50°C	48 h	Pisces	Clupea harengus	soft tissue	not tested		PET, PC, HDPE	severe (PET)*		Budimir et al. 2018
	HCl (2M)		2	20°C	5 min								optional if calciferous material is present
68	NaOH (1M)	A	1	50°C	15 min	Pisces	Coregonus lavaretus	gastrointestinal tract	not tested		HDPE, LDPE, PP, PS, EPS, PET, PA, PVC-P, uPVC	severe (PA, PET, EPS, LDPE, uPVC, pPVC)*		Roch & Brinker 2017
	HNO3 (65%)		2	80°C	15 min
69	NaClO (3%)	A	1	20°C	12 h	Pisces	Clupea harengus, Sardina pilchardus, Engraulis encrasicolus	gastrointestinal tract	not reported		PVC, PET, PE, PP, PS, PC, PA	severe (PVC)*		Collard et al. 2015
	NaClO & HNO3 (65%)		2	20°C	5 min
	CH3OH (99%)		3	20°C	2 h
70	Industrial agent (30%, 100%)	A	1	20°C	5 h	Pisces	Gadus morhua	gastrointestinal tract	not tested	digestion incomplete, slimy residue	PP, LDPE, HDPE, PS, EPS, ABS, PUR, PA,EVA, PET, PC, Nitrile, PVC, PMMA, PTFE, RE	not reported	contains: ∼3% KOH, ∼1% K5O10P3, ∼1% K2SiO3 and ∼7% NaClO	Enders et al. 2017
	Industrial agent (30%, 100%)		2	80°C	20 min
71	KOH (30%) & NaClO	C	1	20°C	5 h	Pisces	Gadus morhua	gastrointestinal tract	not tested	foaming	PP, LDPE, HDPE, PS, EPS, ABS, PUR, PA,EVA, PET, PC, Nitrile, PVC, PMMA, PTFE, RE	none*	most effective protocol	Enders et al. 2017
	KOH (30%) & NaClO		2	80°C	20 min
72	Tris-HCl (400mM) & SDS (5%)	B	1	60˚C	1 h	Pisces	Salmo trutta	gastrointestinal tract	not tested		LDPE, PP, EPS, PA, PET, PE	none*		Karlsson et al. 2017
	Proteinase K		2	50°C	>2 h
	Proteinase K		3	20°C	20 min
	Proteinase K		4	60˚C	20 min
	H2O2 (30%)		5	20°C	12 h
Mollusca
73	HNO3 (9, 18, 35, 50%)	C	1	60°C	1 h	Bivalvia	Mytilus edulis	whole organism, soft tissue	100 %	tissue residues	Nylon, PET, HDPE, PVC	severe (PET, HDPE, Nylon)*	minimum amount needed 35%	Catarino et al. 2017
74	HNO 3 (65%)	A	1	20°C	24h	Bivalvia	Mytilus edulis	whole organism, soft tissue	1	digestion incomplete	NA	not tested*		Phuong et al. 2018
	HNO 3 (65%)		2	80°C	2 h
75	HNO 3 (65%)	B	1	80°C	24h	Bivalvia	Mytilus edulis	whole organism, soft tissue	not tested	digestion incomplete	PE, PP, PVC	intermediate (PE)*		Phuong et al. 2018
76	HNO3 (65%)	A	1	20˚C	12 h	Bivalvia	Mytiilus edulis, Mytilus galloprovincialis	whole organism, soft tissue	not tested		NA	not tested*		Vandermeersch et al. 2015
	HNO3 (65%)		2	100˚C	10 min
77	HNO3 (69%)	A	1	20˚C	12 h	Bivalvia	Mytilus edulis, Crassostrea gigas	whole organism, soft tissue	not tested		NA	not tested*		Van Cauwenberghe & Jansen 2014
	HNO3 (69%)		2	100˚C	2 h
78	HNO3 (69%)	A	1	20˚C	12 h	Bivalvia	Mytilus edulis	whole organism	not tested		NA	not tested*		Van Cauwenberghe et al. 2015
	HNO3 (69%)		2	100˚C	2 h
79	HNO3 (69-71%)	A	1	90˚C	4 h	Bivalvia	Venerupis philippinarum	whole organism, soft tissue	not tested		NA	not tested*		Davidson & Dudas 2016
80	HNO3 (22.5 M)	C	1	20˚C	12 h	Bivalvia	Mytilus edulis	whole organism, soft tissue	not reported		PS, Nylon	severe (PS, Nylon)*	most effective protocol, using different filtration temperatures	Claessens et al., 2013
	HNO3 (22.5 M)	C	2	100˚C	2 h
81	HNO3 (22.5 M)	D	1	60˚C	1 h	Bivalvia	Mytilus edulis	whole organism, soft tissue	0.9974		PS, Nylon	severe (Nylon)*	using different filtration temperatures;	Claessens et al., 2013
	HNO3 (22.5 M)		2	100˚C	1 h
82	HNO3 (22.5 M)	E	1	60˚C	24 h	Bivalvia	Mytilus edulis	whole organism, soft tissue	0.9952		NA	not tested*	using different filtration temperatures;	Claessens et al., 2013
83	HNO3 (22.5 M)	A	1	20˚C	12 h	Bivalvia	Perna perna	whole organism, soft tissue	not tested		NA	not tested*		Santana et al. 2016
	HNO3 (22.5 M)		2	100˚C	15 min
84	HNO3 (65%)/HCl (37%)	D	1	20°C	24h	Bivalvia	Mytilus edulis	whole organism, soft tissue	0.99	digestion incomplete	NA	not tested*		Phuong et al. 2018
	HNO3 (65%)/HCl (37%)		2	80°C	2 h
85	HNO3 (22.5 M) & HCl (32.3 M)	F	1	60˚C	1 h	Bivalvia	Mytilus edulis	whole organism, soft tissue	0.9911		NA	not tested*	using different filtration temperatures	Claessens et al., 2013
	HNO3 (22.5 M) & HCl (32.3 M)		2	100˚C	1 h
86	HNO3 (22.5 M) & HCl (32.3 M)	G	1	60˚C	24 h	Bivalvia	Mytilus edulis	whole organism, soft tissue	0.9838		NA	not tested*	using different filtration temperatures	Claessens et al., 2013
87	HNO3 (65%) & HClO4 (68%)	A	1	20˚C	12 h	Bivalvia	Mytilus edulis	whole organism, soft tissue	not tested		NA	not tested*		De Witte et al. 2014
	HNO3 (65%) & HClO4 (68%)		2	100˚C	10 min
88	HNO3 (65%) & HClO4 (68%) (4:1)	B	1	20˚C	12 h	Bivalvia	Mytiilus edulis, Mytilus galloprovincialis	whole organism, soft tissue	not tested		NA	not tested*		Vandermeersch et al. 2015
	HNO3 (65%) & HClO4 (68%) (4:1)		2	100˚C	10 min
89	HNO3 (65%)/HClO4 (70%)	E	1	20°C	24h	Bivalvia	Mytilus edulis	whole organism, soft tissue	0.99	digestion incomplete	NA	not tested*		Phuong et al. 2018
	HNO3 (65%)/HClO4 (70%)		2	80°C	2 h
90	KOH (1 M)	A	1	20°C	12 h, 2 d, 4 d, 8 d	Bivalvia	Serripes groenlandicus	whole organism, soft tissue	33 - 60%	max. digestion after 8 d	weathered LD-PE	none*		von Friesen et al., 2019
91	KOH (10%)	A	1	60˚C	24 h	Bivalvia	Mytilus edulis	whole animals, soft tissue	1		LDPE, HDPE, PP, PA, PS	severe (CA), intermediate (PET)*	most effective protocol	Dehaut et al. 2016
92	KOH (10%)	F	1	20°C	24 h	Bivalvia	Mytilus edulis	whole organism, soft tissue	1		NA	not tested*		Phuong et al. 2018
	KOH (10%)		2	80°C	2 h
93	KOH (10%)	G	1	80°C	24 h	Bivalvia	Mytilus edulis	whole organism, soft tissue	1		PE, PP, PVC	none*	most effective protocol	Phuong et al. 2018
94	KOH (10%)	A	1	60˚C	12 h	Bivalvia	Crassostrea gigas	gastrointestinal tract	not tested		NA	not tested*		Rochman et al. 2015
95	KOH (10%)	A	1	60°C, 40°C	48 h	Bivalvia	Ostrea edulis, Magallana gigas, Ruditapes philippinarum	whole organism	91 - 98%	potential effects > 40°C	PS, PP, PET, PA, Acrylic, Rayon, PVC, LDPE	>40°C: severe (Rayon)*		Thiele et al., 2019
96	KOH (10%)	A	1	50°C	12 h	Bivalvia	Mytilus galloprovincials	whole organism, soft tissue	not tested		PE, PP, PET	not reported*		Tsangaris et al., 2021
	KOH (10%)		2	20°C	<48 h
97	NaOH (0.25, 0.5, 1.0, 2.5, 5M)	D	1	60˚C	1 h	Bivalvia	Mytilus edulis	whole organism, soft tissue	100 %	tissue residues	Nylon, PET, HDPE, PVC	none*	minimum amount needed 1M	Catarino et al. 2017
98	NaOH (30%)	H	1	20°C	24 h	Bivalvia	Mytilus edulis	whole organism, soft tissue	0.98	digestion incomplete	NA	not tested*		Phuong et al. 2018
	NaOH (30%)		2	80°C	2 h
99	NaOH (52.5 M)	H	1	60˚C	1 h	Bivalvia	Mytilus edulis	whole organism, soft tissue	99.54		NA	not tested*	using different filtration temperatures	Claessens et al., 2013
	NaOH (52.5 M)		2	100˚C	1 h
100	NaOH (52.5 M)	I	1	60˚C	24 h	Bivalvia	Mytilus edulis	whole organism, soft tissue	0.9595		NA	not tested*	using different filtration temperatures	Claessens et al., 2013
101	H2O2 (15%)	B	1	50°C	30 h	Bivalvia	Mytilus galloprovincials	whole organism, soft tissue	not tested		PE, PP, PET	not reported*		Tsangaris et al., 2021
	H2O2 (15%)		2	20°C	<5 d
102	H2O2 (30%)	A	1	65˚C	24 h	Bivalvia	Scapharca subcrenata, Tegillarca granosa, Mytilus galloprovincialis, Patinopecten yessoensis, Alectryonella plicatula, Sinonovacula constricta, Ruditapes philippinarum, Meretrix lusoria, Cyclina sinensis	whole organism, soft tissue	not tested	foaming	NA	not tested*		Li et al. 2015
	H2O2 (30%)		2	20˚C	24 - 48 h
103	H2O2 (30%)	A	1	65˚C	24 h	Bivalvia	Mytilus edulis	whole organism, soft tissue	not tested		PS, PE	intermediate*		Li et al. 2016
	H2O2 (30%)		2	20˚C	24 - 48 h
104	H2O2 (30%)	A	1	55 - 65˚C	unkown	Bivalvia	Mytilus edulis	whole organism, soft tissue	not tested	foaming	NA	not tested*		Mathalon & Hill 2014
105	H2O2 (30%)	B	1	60°C	24h	Bivalvia	Ostrea edulis	whole organism, soft tissue	not tested	foaming	NA	not tested		Thiele et al., 2019
106	H2O2 (32.6 M)	A	1	60˚C	1 h	Bivalvia	Mytilus edulis	whole organism, soft tissue	0.9955		NA	not tested*	using different filtration temperatures	Claessens et al., 2013
	H2O2 (32.6 M)		2	100˚C	1 h
107	H2O2 (32.6 M)	B	1	60˚C	24 h	Bivalvia	Mytilus edulis	whole organism, soft tissue	0.9851		NA	not tested*	using different filtration temperatures	Claessens et al., 2013
108	K2S2O8 (0.27M) & NaOH (0.24M)	B	1	65˚C	24 h	Bivalvia	Mytilus edulis	whole animals, soft tissue	0.99	digestion incomplete	LDPE, HDPE, PP, PA, PS	severe (CA, PUR)*		Dehaut et al. 2016
109	HNO3 (65%)/H2O2 (30%)	C	1	20°C	24h	Bivalvia	Mytilus edulis	whole organism, soft tissue	0.97	digestion incomplete	NA	not tested*		Phuong et al. 2018
	HNO3 (65%)/H2O2 (30%)		2	80°C	2 h
110	HNO3 (22.5 M) & H2O2 (32.6 M)	J	1	60˚C	1 h	Bivalvia	Mytilus edulis	whole organism, soft tissue	not reported	foaming	NA	not tested*	using different filtration temperatures	Claessens et al., 2013
	HNO3 (22.5 M) & H2O2 (32.6 M)		2	100˚C	1 h
111	HNO3 (22.5 M) & H2O2 (32.6 M)	K	1	60˚C	24 h	Bivalvia	Mytilus edulis	whole organism, soft tissue	not reported	foaming	NA	not tested*	using different filtration temperatures	Claessens et al., 2013
112	HNO3 (65%)	A	1	unkown	unkown	Gastropoda	Patella vulgata,	whole organism, soft tissue	not tested		LDPE, PP, EPS, PA, PET, PE	severe (PP, PE, PA, EPS, PET, LDPE)*	microwave	Karlsson et al. 2017
	H2O2 (>30%)		2	unkown	unkown		Littorina littorea,
	NaOH (2M)		3	unkown	unkown		Turritellidae sp.
113	HNO3 (unknown)	A	1	unspecified	45 min	Bivalvia	Mytilus edulis, Crassostrea gigas	whole organism, soft tissue	not tested		NA	not tested*	microwave	Leslie et al. 2017
	H2O2 (30%)		2	unknown	unknown
	NaOH (unknown)		3	unknown	unknown
114	HNO3 (unknown)	A	1	unknown	45 min	Gastropoda	Littorina littorea	whole organism, soft tissue	not tested		NA	not tested*	microwave	Leslie et al. 2017
	H2O2 (30%)		2	unknown	unknown
	NaOH (unknown)		3	unknown	unknown
115	Collagenase (0.3125%)	A	1	38-42°C	30 min	Bivalvia	Mytilus edulis	whole organism, soft tissue	0.78		NA	not tested		Courtene-Jones et al. 2017
116	Corolase (0.1 - 1%)	A	1	60°C	1 h	Bivalvia	Mytilus edulis	whole organism, soft tissue	100 %	tissue residues	Nylon, PET, HDPE, PVC	none*	minimum amount needed 0.5%	Catarino et al. 2017
117	Corolase (0.5 - 2%)	B	1	60°C	12. h	Bivalvia	Mytilus edulis	whole organism, soft tissue	100 %		Nylon, PET, HDPE, PVC	none*	most effective protocol	Catarino et al. 2017
118	Papain (0.3125%)	B	1	38-42°C	30 min	Bivalvia	Mytilus edulis	whole organism, soft tissue	0.75		NA	not tested		Courtene-Jones et al. 2017
119	Porcine pancreatic enzyme (PEz) Creon®	B	1	37.5°C	12 h, 2 d, 4 d, 8 d	Bivalvia	Serripes groenlandicus	whole organism, soft tissue	95 - 98%		weathered LD-PE, PU, PES, PS, PLA, PP, PET, LDPE, HDPE, cellophane, wool, cotton	none	most effective protocol; 12 h digestion sufficient	von Friesen et al., 2019
120	Proteinase K	C	1	50°C	2h	Bivalvia	Ostrea edulis	whole organism, soft tissue	not tested	high cost	NA	not tested*		Thiele et al., 2019
121	Trypsin (0.08, 0.15, 0.3125, 0.625, 1.25, 2.5%)	C	1	38-42°C	30 min	Bivalvia	Mytilus edulis	whole organism, soft tissue	0.88	gelatinous residue	PET, PA, HDPE, PVC, PP, PS	none	minimum amount needed 0.3125%	Courtene-Jones et al. 2017
122	Trypsin (0.3125%)	D	1	38-42°C	2h	Bivalvia	Magallana gigas	whole organism, soft tissue	0.96		NA	not tested*	dry weight change of filters as efficacy	Thiele et al., 2019
123	Protease, lipase, cellulase and chitinase & SDS (unknown)	A	1	unkown	unkown	Bivalvia	Mytilus edulis, Gari solida, Paphia undulata, Perna canaliculus	whole organism, soft tissue	not tested		NA	not tested		Kumar et al. 2021
124	Tris-HCl (400mM) & SDS (5%)	B	1	60˚C	1 h	Bivalvia	Mytilus edulis	whole organism, soft tissue	not tested		LDPE, PP, EPS, PA, PET, PE	none*		Karlsson et al. 2017
	Proteinase K		2	50°C	<2 h
	Proteinase K		3	20°C	20 min
	Proteinase K		4	60˚C	20 min
	H2O2 (30%)		5	20°C	12 h
Polychaete
125	HNO3 (69%)	A	1	20˚C	12 h	Polychaeta	Arenicola marina	whole organism	not tested		NA	not tested*		Van Cauwenberghe et al. 2015
	HNO3 (69%)		2	100˚C	2 h
126	HNO3 (65%)	A	1	unkown	unkown	Porifera	Hymenacidon perlevis	whole organism, soft tissue	not tested		LDPE, PP, EPS, PA, PET, PE	severe (PP, PE, PA, EPS, PET, LDPE)*	microwave used	Karlsson et al. 2017
	H2O2 (>30%)		2
	NaOH (2M)		3
Definitions:
"Overnight" is reported as 12 h, Room temperature as 20°C
Exclusion criteria:
No terrestrial animals; No water samples or bulk samples; No protocols using exclusively methods such as visual sorting, histology, density separation or other mechanical techniques
Chemical effect on MPs is defined as follows:
none - no effects; intermediate - effects on MP types include: coloration, deformation, agglomeration, change in shape; severe - effects on MP types include: dissolution, fragmentation, change in size
If other literature mentions a negative effect of used reagent on MPs it is marked with an asterisk
Abbreviations of MPs:
CA: cellulose acetate; HDPE: high density polyethylene; LDPE: low density polyethylene; PA: polyamide; PC: polycarbonate; PE: polyethylene; PET: polyethylene terephthalate; PMMA: poly(methyl-methacrylate); PP: polypropylene; PS: polystyrene; PUR: polyurethane; uPVC: unplasticized polyvinyl chloride, PVC: polyvinyl chloride, RE: Rubber elastormer, PTFE: polytetrafluoroethylene, EVA: ethylene-vinyl…
